# Supplementary material
Source: Springer Nature journal article supplement (https://www.springermedizin.de/resource/supplementary/12967_2012_1087_MOESM8_ESM.pdf/9573222)

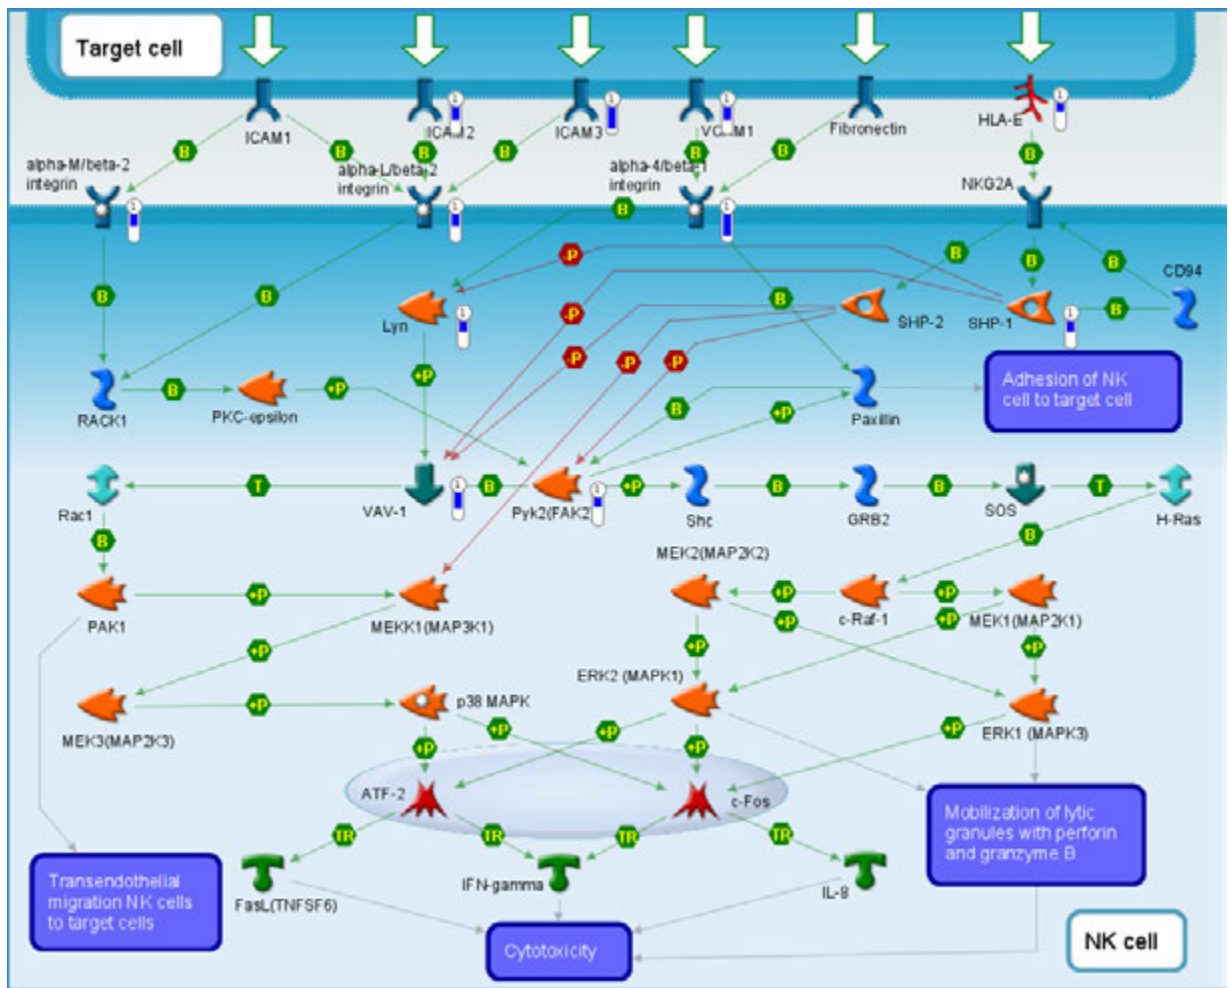

Supplement: MOESM8 [file 9573222]
